# Supplementary material for: A comprehensive investigation into sample extraction and method validation for the identification of antifungal compounds produced by lactic acid bacteria using HPLC-UV/DAD
Source: Royal Society of Chemistry journal article supplement (doi:10.1039/c3ay42217h), 2014-01-01
Supplement: c3ay42217h2.pdf [file c3ay42217h2.pdf]

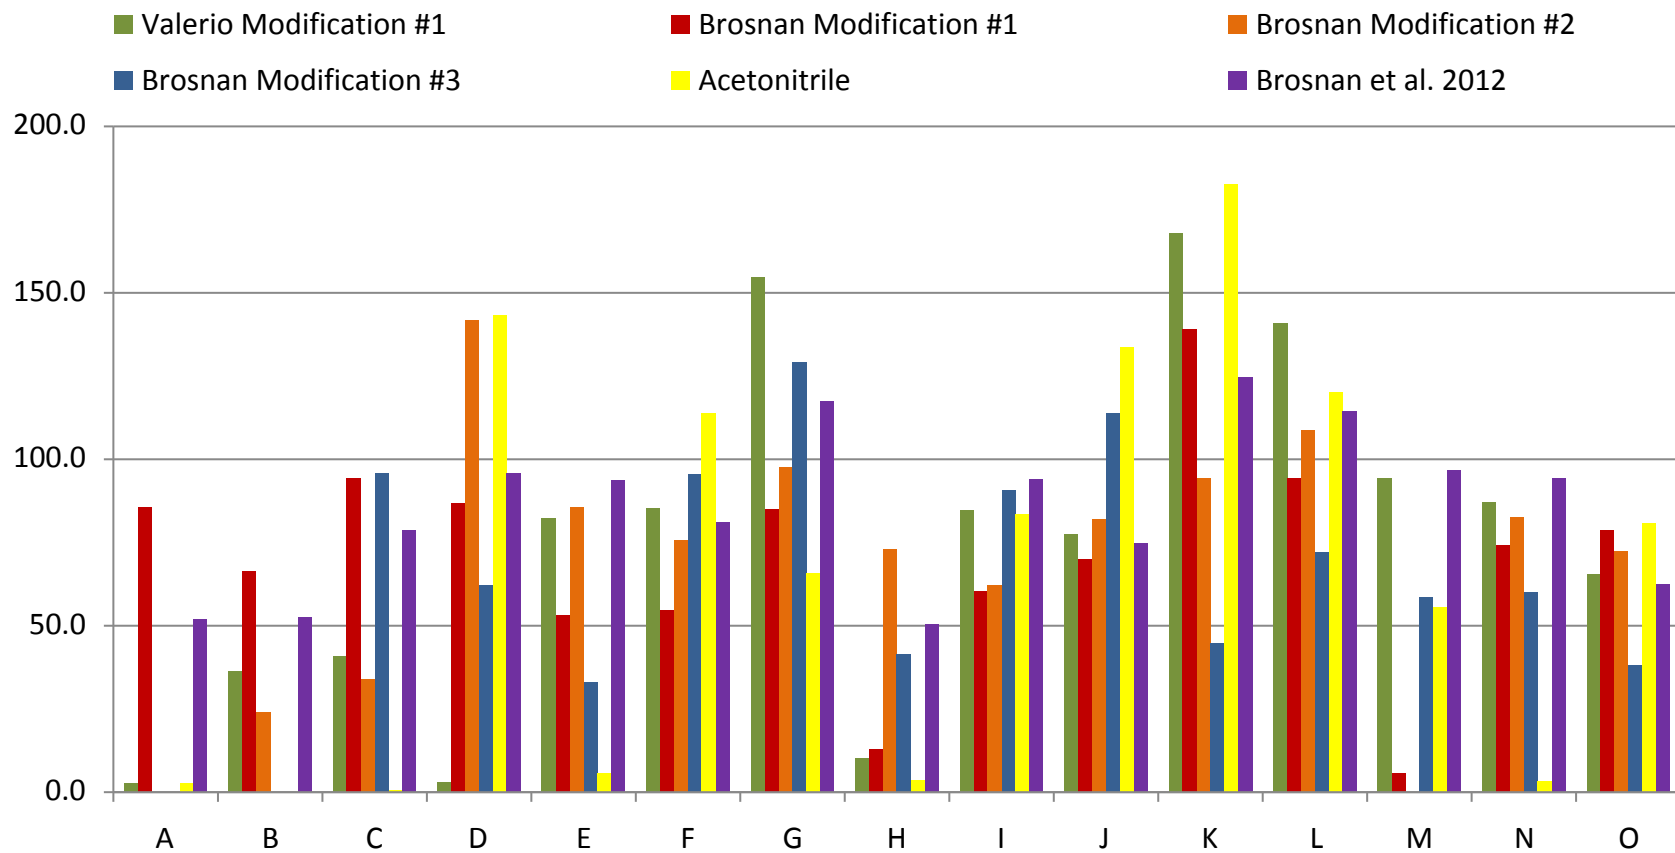

Supplementary Fig. 2:
