# Supplementary material for: A comprehensive investigation into sample extraction and method validation for the identification of antifungal compounds produced by lactic acid bacteria using HPLC-UV/DAD
Source: Royal Society of Chemistry journal article supplement (doi:10.1039/c3ay42217h), 2014-01-01
Supplement: c3ay42217h5.pdf [file c3ay42217h5.pdf]

| <i>Antifungal compound</i>                | <i>Equation of line</i> | <i>Correlation coefficient (R<sup>2</sup>)</i> | <i>Linear range (µg/ml)<sup>a</sup></i> | <i>Intra-day RSD (%)<sup>b</sup></i> | <i>Inter-day RSD (%)<sup>c</sup></i> | <i>LOQ (µg/ml)<sup>d</sup></i> | <i>LOD (µg/ml)<sup>e</sup></i> |
|-------------------------------------------|-------------------------|------------------------------------------------|-----------------------------------------|--------------------------------------|--------------------------------------|--------------------------------|--------------------------------|
| A) 1,2 – Dihydroxybenzene                 | $y = 49229x + 35200$    | 1.000                                          | 1<br>5<br>10<br>30<br>50                | 5.7<br>1.4<br>0.9<br>0.3<br>0.5      | 5.7<br>2.5<br>1.2<br>0.3<br>0.5      | 0.8                            | 0.5                            |
| B) DL –p - Hydroxyphenyllactic acid       | $y = 30959x + 1285$     | 1.000                                          | 1<br>5<br>10<br>30<br>50                | 7.3<br>1.4<br>1.9<br>0.1<br>0.2      | 7.9<br>2.7<br>1.8<br>0.7<br>0.9      | 0.5                            | 0.2                            |
| C) 4 – Hydroxybenzoic acid                | $y = 63307x + 45144$    | 1.000                                          | 1<br>5<br>10<br>30<br>50                | 2.1<br>1.0<br>1.2<br>1.0<br>1.2      | 3.2<br>1.2<br>1.8<br>0.9<br>0.9      | 0.5                            | 0.2                            |
| D) 3,4 – Dihydroxyhydrocinnamic acid      | $y = 45311x + 23772$    | 0.999                                          | 1<br>5<br>10<br>30<br>50                | 3.5<br>2.0<br>0.0<br>0.6<br>1.2      | 3.2<br>1.6<br>1.2<br>0.7<br>0.9      | 0.5                            | 0.2                            |
| E) Vanillic acid                          | $y = 74265x + 58429$    | 0.999                                          | 1<br>5<br>10<br>30<br>50                | 2.1<br>0.9<br>0.2<br>0.1<br>0.8      | 3.0<br>1.2<br>1.3<br>0.7<br>1.4      | 0.5                            | 0.2                            |
| F) Caffeic acid                           | $y = 47634x + 15727$    | 1.000                                          | 1<br>5<br>10<br>30<br>50                | 1.8<br>1.4<br>0.8<br>1.0<br>1.0      | 4.3<br>1.6<br>1.3<br>0.8<br>1.0      | 0.5                            | 0.2                            |
| G) 3 – (4-hydroxyphenyl) – propionic acid | $y = 34793x + 11800$    | 1.000                                          | 1<br>5<br>10<br>30<br>50                | 3.5<br>1.4<br>0.5<br>0.5<br>0.5      | 5.3<br>1.4<br>1.4<br>0.8<br>0.9      | 0.6                            | 0.3                            |
| H) Phenyllactic acid                      | $y = 31199x + 9843$     | 1.000                                          | 1<br>5<br>10<br>30<br>50                | 4.9<br>3.9<br>0.5<br>1.0<br>0.3      | 6.4<br>3.3<br>1.0<br>1.0<br>0.9      | 0.8                            | 0.5                            |

|                                                |                      |       |                          |                                 |                                 |     |     |
|------------------------------------------------|----------------------|-------|--------------------------|---------------------------------|---------------------------------|-----|-----|
| I) p – Coumaric acid                           | $y = 42453x + 42357$ | 0.999 | 1<br>5<br>10<br>30<br>50 | 7.3<br>0.6<br>2.3<br>1.0<br>0.7 | 6.9<br>1.0<br>4.4<br>4.1<br>2.0 | 0.6 | 0.3 |
| J) 3-(4-hydroxy-3-methoxyphenyl)propanoic acid | $y = 53725x + 34875$ | 1.000 | 1<br>5<br>10<br>30<br>50 | 4.2<br>0.5<br>0.1<br>0.5<br>0.7 | 4.6<br>1.3<br>1.6<br>1.4<br>0.9 | 0.5 | 0.2 |
| K) Benzoic acid                                | $y = 20318x + 1430$  | 1.000 | 1<br>5<br>10<br>30<br>50 | 3.5<br>1.8<br>2.1<br>0.3<br>0.1 | 6.4<br>2.8<br>1.5<br>0.8<br>0.9 | 0.6 | 0.3 |
| L) Ferulic acid                                | $y = 35918x + 22679$ | 1.000 | 1<br>5<br>10<br>30<br>50 | 8.7<br>0.0<br>0.8<br>0.9<br>0.3 | 6.9<br>1.6<br>1.5<br>1.2<br>1.1 | 0.9 | 0.6 |
| M) Salicylic acid                              | $y = 61383x + 57587$ | 0.999 | 1<br>5<br>10<br>30<br>50 | 1.6<br>0.7<br>0.6<br>1.3<br>0.2 | 7.0<br>2.4<br>4.2<br>1.4<br>3.1 | 0.6 | 0.3 |
| N) Hydrocinnamic acid                          | $y = 28721x + 18766$ | 1.000 | 1<br>5<br>10<br>30<br>50 | 5.6<br>1.3<br>0.2<br>0.9<br>0.1 | 7.6<br>1.2<br>0.9<br>1.2<br>1.6 | 0.9 | 0.6 |
| O) Methylcinnamic acid                         | $y = 58763x + 45565$ | 0.999 | 1<br>5<br>10<br>30<br>50 | 1.2<br>2.5<br>0.2<br>1.2<br>1.2 | 3.4<br>2.8<br>1.9<br>1.2<br>1.4 | 0.6 | 0.3 |

2 **Supplementary Table 1.**

3 <sup>a</sup> 10 $\mu$ L injection, <sup>b</sup> relative standard deviation on same day (n=3), <sup>c</sup> relative standard  
4 deviation (n=9 over 3days) <sup>d</sup> Limit of quantitation (S/N=10), <sup>e</sup> Limit of detection (S/N=3).

5

6

| <b>Compounds identified</b> | <b>Run time</b> | <b>Column</b>                                                                    | <b>Flow-rate</b> | <b>Chromatogram shown</b> | <b>Validation data provided</b>                                                                                                 | <b>Extraction % recoveries</b>                                                         | <b>Reference</b> |
|-----------------------------|-----------------|----------------------------------------------------------------------------------|------------------|---------------------------|---------------------------------------------------------------------------------------------------------------------------------|----------------------------------------------------------------------------------------|------------------|
| PLA, OH-PLA                 | 15 mins         | $\mu$ RPC C2/C18 column (100 x 4.6 mm, 3 $\mu$ m particle size)                  | 1 mL/min         | No                        | Standard curves were performed. However, no linear ranges or the number of repetitions were reported. LOD values were reported. | PLA (97% $\pm$ 2.0% and 88% $\pm$ 1.8%)<br>OH-PLA (98% $\pm$ 1.8% and 98% $\pm$ 1.5%). | <sup>13</sup>    |
| PLA                         | 12 mins         | Symmetry column C18RP (150 x 4.6 mm, 5 $\mu$ m particle size)                    | 1 mL/min         | Yes                       | 7 concentrations (5-500 $\mu$ g/mL) with replicates (n = 3)                                                                     | PLA gave 98.7% recovery                                                                | <sup>34</sup>    |
| OH-PLA                      | 10 mins         | Agilent Zorbax SB-C <sub>18</sub> column (150 x 4.6 mm, 5 $\mu$ m particle size) | 1 mL/min         | Yes                       | The method claimed it was quantitative however, no method validated data provided                                               | N/A as direct injection used.                                                          | <sup>35</sup>    |

**8 Supplementary Table 2.**
